# Supplementary material
Source: PubMed Central journal article supplement (PMC3105640)
Supplement: 2010.038307_2.pdf [file 2010.038307_2.pdf]

**Manuscript no. HAEMATOL2010/038307 entitled “Delayed hemolytic transfusion reaction in children with sickle cell disease“**

**Authors: Mariane de Montalembert, Marie-Dominique Dumont, Claire Heilbronner, Valentine Brousse, Oussama Charrara, Béatrice Pellegrino, Christophe Piguet, Valérie Soussan, France Noizat-Pirenne**

**Information about the contributions of each person named as having participated in the study**

**1) Guarantor**, i.e., person(s) who is (are) responsible for the integrity of the work as a whole:  
• Mariane de Montalembert, Service de Pédiatrie Générale, Hôpital Necker-Enfants Malades, AP-HP, Paris ; Centre de Référence de la drépanocytose ; Université Paris Descartes, France. [Mariane.demontal@nck.aphp.fr](mailto:Mariane.demontal@nck.aphp.fr)

According to the International Committee of Medical Journal Editors (ICMJE) ([http://www.icmje.org/ethical\\_1author.html](http://www.icmje.org/ethical_1author.html)): “*Authorship credit should be based on: 1) substantial contributions to conception and design, acquisition of data, or analysis and interpretation of data; 2) drafting the article or revising it critically for important intellectual content; and 3) final approval of the version to be published. Authors should meet conditions 1, 2, and 3 ..... Acquisition of funding, collection of data, or general supervision of the research group alone does not constitute authorship*”.

The guarantors of this manuscript confirm that all persons designated as authors qualify for authorship, and that each author has participated sufficiently in the work to take public responsibility for appropriate portions of the content.

**2) Authors who participated in the conception of the study:**  
• Mariane de Montalembert, Service de Pédiatrie Générale, Hôpital Necker-Enfants Malades, AP-HP, Paris ; Centre de Référence de la drépanocytose ; Université Paris Descartes, France. [Mariane.demontal@nck.aphp.fr](mailto:Mariane.demontal@nck.aphp.fr).  
• France Noizat-Pirenne, Etablissement Français du Sang Ile de France, Site Henri Mondor, Créteil, France, INSERM U 955, France [france.noizat-pirenne@efs.sante.fr](mailto:france.noizat-pirenne@efs.sante.fr).

**3) Design & Methods.** The following authors were responsible for specific investigations  
• Claire Heilbronner, Service de Pédiatrie Générale, Hôpital Necker-Enfants Malades, AP-HP, Paris. [Claire.heilbronner@nck.aphp.fr](mailto:Claire.heilbronner@nck.aphp.fr) : was responsible for taking care of the patients, acquisition of data, revising the manuscript, final approval of the version to be published.  
• Valentine Brousse, Service de Pédiatrie Générale, Hôpital Necker-Enfants Malades, AP-HP, Paris; Centre de Référence de la drépanocytose, France . [Valentine.brousse@nck.aphp.fr](mailto:Valentine.brousse@nck.aphp.fr). was responsible for taking care of the patients, acquisition of data, revising the manuscript, final approval of the version to be published.  
• Oussama Charrara, Service de Pédiatrie, Hôpital André Mignot, Le Chesnay, France. [Ocharara@ch-versailles.fr](mailto:Ocharara@ch-versailles.fr). was responsible for taking care of the patients, acquisition of data, revising the manuscript, final approval of the version to be published.  
• Béatrice Pellegrino, Service de Pédiatrie, Centre Hospitalier Intercommunal Poissy-Saint Germain en Laye, [France.bpellegrino@chi-poissy-st-germain.fr](mailto:France.bpellegrino@chi-poissy-st-germain.fr); was responsible for taking care of the patients, acquisition of data, revising the manuscript, final approval of the version to be published.  
• Christophe Piguet, Unité d’Onco-Hématologie Pédiatrique, Hôpital Mère-Enfant, Limoges, France, [christophe.piguet@chu-limoges.fr](mailto:christophe.piguet@chu-limoges.fr), was responsible for taking care of the patients, acquisition of data, revising the manuscript, final approval of the version to be published.

- Valérie Soussan, Service de Pédiatrie, Générale, Hôpital Ambroise Paré, AP-HP, Paris, France. [Valerie.soussan-banini@apr.aphp.fr](mailto:Valerie.soussan-banini@apr.aphp.fr), was responsible for taking care of the patients, acquisition of data, revising the manuscript, final approval of the version to be published.
- Marie-Dominique Dumont, Etablissement Français du Sang Ile de France, Site Necker-Enfants Malades, Paris, France, [marie-dominique.dumont@nck.aphp.fr](mailto:marie-dominique.dumont@nck.aphp.fr), was responsible for immuno-hematological studies, acquisition of data, revising the manuscript, final approval of the version to be published.
- France Noizat-Pirenne, Etablissement Français du Sang Ile de France, Site Henri Mondor, Créteil, France, INSERM U 955, [France. france.noizat-pirenne@efs.sante.fr](mailto:France.france.noizat-pirenne@efs.sante.fr), was responsible for immuno-hematological studies, acquisition of data, revising the manuscript, final approval of the version to be published.

4) **Results.** The following authors were responsible for specific portions of the results, including figures and tables

- Mariane de Montalembert was responsible for analysis of the results, and Figure 1, Tables 1, 2, 3
- France Noizat-Pirenne and Marie-Dominique Dumont were responsible for analysis of the results and Table 2

5) **Writing the manuscript.** The following authors were responsible for writing the manuscript:

- Mariane de Montalembert and France Noizat-Pirenne were responsible for writing the manuscript

6) **Contributors Listed in Acknowledgments:**

Dr Descazeaud, EFS Aquitaine Limousin, site de Limoges, helped for the discussion of case 8  
Dr Wolfe helped for improving the English text.
